# Supplementary material for: Two water-stable lanthanide metal–organic frameworks with oxygen-rich channels for fluorescence sensing of Fe(iii) ions in aqueous solution
Source: Royal Society of Chemistry journal article supplement (doi:10.1039/c8dt03741h), 2018-01-01
Supplement: c8dt03741h1.pdf [file c8dt03741h1.pdf]

# **Two Water-stable Lanthanide Metal-Organic Frameworks with Oxygen-rich Channels for Fluorescence Sensing Fe(III) ions in Aqueous Solution**

Lizhen Liu,<sup>a</sup> Yu, Wang,<sup>a</sup> Rongyan, Lin<sup>a</sup> Zizhu Yao,<sup>a</sup> Quanjie Lin,<sup>a</sup> Lihua Wang,<sup>\*,a</sup> Zhangjing Zhang,<sup>\*,a,b</sup> and Shengchang Xiang,<sup>a,b</sup>

<sup>a</sup>*Fujian Provincial Key Laboratory of Polymer Materials, College of Chemistry and Materials Science, Fujian Normal University, 32 Shangsang Road, Fuzhou 350007, PR China*

<sup>b</sup>*State Key Laboratory of Structural Chemistry, Fujian Institute of Research on the Structure of Matter, Chinese Academy of Sciences, Fuzhou, Fujian 350002, People's Republic of China*

# Content

|                                                                                                                                                                                                                                                                                                                                                                                                                                                                                                                                   |     |
|-----------------------------------------------------------------------------------------------------------------------------------------------------------------------------------------------------------------------------------------------------------------------------------------------------------------------------------------------------------------------------------------------------------------------------------------------------------------------------------------------------------------------------------|-----|
| 1. Materials and measurement.....                                                                                                                                                                                                                                                                                                                                                                                                                                                                                                 | S3  |
| <b>Fig. S1</b> Powder XRD patterns of <b>FJU-13a-Eu</b> after immersing in aqueous solution containing several of metal ions.....                                                                                                                                                                                                                                                                                                                                                                                                 | S6  |
| <b>Fig. S2</b> IR Spectra of <b>FJU-13-Tb</b> .....                                                                                                                                                                                                                                                                                                                                                                                                                                                                               | S7  |
| <b>Fig. S3.</b> TG curves for compounds <b>FJU-13-Eu</b> and <b>FJU-13-Tb</b> .....                                                                                                                                                                                                                                                                                                                                                                                                                                               | S8  |
| <b>Fig. S4</b> 77 K N <sub>2</sub> adsorption (a) and 273 K CO <sub>2</sub> adsorption (b) in <b>FJU-13a-Eu</b> and <b>FJU-13a-Tb</b> .....                                                                                                                                                                                                                                                                                                                                                                                       | S9  |
| <b>Fig. S5</b> Concentration-dependent luminescence quenching of <b>FJU-13a-Eu</b> and <b>FJU-13a-Tb</b> after adding different concentrations of Fe <sup>3+</sup> ions.....                                                                                                                                                                                                                                                                                                                                                      | S10 |
| <b>Fig. S6</b> Time dependent adsorption capacity of 30 mg of <b>FJU-13a-Eu</b> and <b>FJU-13a-Tb</b> in 15 mL of Fe <sup>3+</sup> aqueous solution, respectively.....                                                                                                                                                                                                                                                                                                                                                            | S11 |
| <b>Fig. S7</b> Solid line: UV-Vis spectra of aqueous solutions containing 1 mM M(NO <sub>3</sub> ) <sub>x</sub> (M = Ag <sup>+</sup> , Al <sup>3+</sup> , Ba <sup>2+</sup> , Ce <sup>3+</sup> , Co <sup>2+</sup> , Cr <sup>3+</sup> , Cu <sup>2+</sup> , K <sup>+</sup> , Mg <sup>2+</sup> , Ni <sup>2+</sup> , Zn <sup>2+</sup> , Fe <sup>2+</sup> and Fe <sup>3+</sup> ); Dashed line: UV-Vis spectra of dispersed 10 mg <b>FJU-13a-Eu</b> in 5 mL H <sub>2</sub> O; Dotted line: Excitation spectra of <b>FJU-13a-Eu</b> ..... | S12 |
| <b>Fig. S8</b> UV-Vis spectra of aqueous solutions containing different concentration of Fe <sup>3+</sup> .....                                                                                                                                                                                                                                                                                                                                                                                                                   | S13 |
| <b>Fig. S9</b> X-ray photo-electron spectrum of <b>FJU-13a-Eu</b> and <b>Fe<sup>3+</sup>@FJU-13a-Eu</b> .....                                                                                                                                                                                                                                                                                                                                                                                                                     | S14 |
| <b>Table S1.</b> Observed Fe <sup>3+</sup> ion amount in the filtrate solution of MOF <b>FJU-13a-Eu</b> before and after the addition of different concentration of Fe(NO <sub>3</sub> ) <sub>3</sub> determined by ICP.....                                                                                                                                                                                                                                                                                                      | S15 |
| <b>Table S2.</b> Comparison of the detective sensitivity in various Fe <sup>3+</sup> sensors.....                                                                                                                                                                                                                                                                                                                                                                                                                                 | S16 |
| <b>Table S3.</b> Compare the oxygen content of different MOF for detecting iron ions.....                                                                                                                                                                                                                                                                                                                                                                                                                                         | S17 |
| <b>References</b> .....                                                                                                                                                                                                                                                                                                                                                                                                                                                                                                           | S17 |

## 1 Materials and measurements

All chemicals were commercially available and used as received without further purification. Elemental analyses of the C, H, and N were carried out on a Vario EL III elementary analyzer. Thermogravimetric analyses (TGA) was performed on a METTLER TGA/ SDTA 851 analyzer under nitrogen atmosphere with heating rate of 10 °C/min from 30 °C to 1000 °C. FT-IR spectra of the synthesized complexes were carried out on a Nicolet 5700 FT-IR spectrometer as KBr pellets. Powder X-ray power diffraction (XRD) patterns were performed on a Rigaku MultiFlex diffractometer at 40 kV, 40 mA for Cu K $\alpha$ ( $\lambda$ = 1.5406 Å) with a scan speed of 3 deg/min. X-ray photoelectron spectroscopy (XPS) was performed on the Thermo Scientific ESCALab 250Xi using 200 W monochromated Al K $\alpha$  radiation. The 500  $\mu$ m X-ray spot was used for XPS analysis. Typically the hydrocarbon C1s line at 284.8 eV from adventitious carbon is used for energy referencing. UV-Vis spectra were recorded on Horiba FluoroMax-4. Inductively coupled plasma (ICP) experiments were performed on Thermo-ICAP6300.

### 1.1 Synthesis

The ligand H<sub>3</sub>L was synthesized according to the literature.<sup>1,2</sup>

**Synthesis of {Eu L (H<sub>2</sub>O) (DMA)}<sub>n</sub> (FJU-13-Eu):** A mixture of H<sub>3</sub>L (0.02 mmol) and Eu(NO<sub>3</sub>)<sub>2</sub> (0.04 mmol) was dissolved in 8 mL of DMA/MeOH/H<sub>2</sub>O (1:1:0.5) solutions in a glass vial and a small amount of HAc was added to this mixture, and heated at 110 °C for 48 hours, then cooled to room temperature. Colorless crystals were obtained with 79 % yield based on H<sub>3</sub>L, separated by filtration, washed with water and DMA, and then dried in air. Elemental analysis calcd (%) for C<sub>27</sub>H<sub>26</sub>EuNO<sub>10</sub>: C 47.94, H 3.87, N 2.07. Found: C 47.36, H 3.91, N 2.17. IR (KBr, cm<sup>-1</sup>): Fig. 5a): 2915 (mb,  $\gamma_{C-H}$ ), 1597 (s,  $\gamma_{C=O}$  asymmetric), 1421 (s,  $\gamma_{C=C}$ ), 1379 (m,  $\gamma_{C=O}$  symmetric), 1178 (s,  $\gamma_{C-O}$ ), 1044 (w), 787 (s), 715 (w), 633 (m), 546 (w).

**Synthesis of {Tb L (H<sub>2</sub>O) (DMA)}<sub>n</sub> (FJU-13-Tb):** FJU-13-Tb was synthesized by a method similar to that of FJU-13-Eu, except that Eu(NO<sub>3</sub>)<sub>3</sub> was replaced by Tb(NO<sub>3</sub>)<sub>3</sub> and 110 °C was replaced by 80 °C. Colorless crystals were obtained with 49% yield based on H<sub>3</sub>L. Elemental analysis calcd (%) for C<sub>27</sub>H<sub>26</sub>TbNO<sub>10</sub>: C 47.45, H 3.83, N 2.05. Found: C 45.99, H 3.75, N 2.13. IR (KBr, cm<sup>-1</sup>): Fig. S2): 2931 (mb, γ<sub>C-H</sub>), 1578 (s, γ<sub>C=O</sub> asymmetric), 1429 (s, γ<sub>C=C</sub>), 1382 (m, γ<sub>C=O</sub> symmetric), 1159 (s, γ<sub>C-O</sub>), 1045 (w), 789 (s), 729 (w), 641 (m), 540 (w).

## 1.2 Luminescent measurements

The as-prepared sample of FJU-13-Eu and FJU-13-Tb (~0.2 g) was soaked in ~20 mL of methanol for 1 h, and then the solvent was decanted. Following the procedure of methanol soaking and decanting 10 times, the solvent-exchanged samples were activated by vacuum at 120 °C overnight (~12 h) for the activated FJU-13a-Eu and FJU-13a-Tb, respectively. To examine the potential of FJU-13-Eu and FJU-13-Tb for sensing metal ions, the grounded powder sample of the MOF (10 mg) was immersed in 5 mL of different metal ions aqueous solutions, respectively, which were treated by ultrasonication for 0.5 h to form a stable turbid suspension. The corresponding fluorescence emission spectra recorded by a Horiba FluoroMax-4 fluorescence spectrometer. The strongest emission wavelengths for FJU-13a-Eu and FJU-13a-Tb were located at 616 nm and 545 nm when excited at 320 nm, respectively.

**Studies in the simulated physiological conditions.** According to the previous literature reports<sup>3-4</sup> HEPES (2-[4-(2-hydroxyethyl)-1-piperazinyl] ethanesulfonic acid) was used as the raw material of the biological solution. The solution (20 mM HEPES aqueous buffer solution (pH = 7)) was prepared by adding 476 mg HEPES into 100 mL water. Then, 10 mg FJU-13a-Eu and FJU-13a-Tb was introduced into 5.00 mL Fe<sup>3+</sup>@HEPES solutions with different concentrations of Fe<sup>3+</sup> in the buffered solution and then completing ultrasonic agitation for 30 minutes to form a stable turbid suspension.

### 1.3 Adsorption measurement

After the bulk of the solvent was decanted, the freshly prepared sample of **FJU-13-Eu** and **FJU-13-Tb** (~0.12 g) was soaked in CH<sub>3</sub>OH for 1 hour, and then the solvent was decanted. Following the procedure of CH<sub>3</sub>OH soaking and decanting 10 times, the solvent-exchanged samples were activated by vacuum at 120 °C until a pressure of 5 μm Hg. 77 K N<sub>2</sub> and 273 K CO<sub>2</sub> adsorption isotherms were measured on Micromeritics ASAP 2020 HD88 surface area analyzer for the guest-free **FJU-13a-Eu** and **FJU-13a-Tb**.

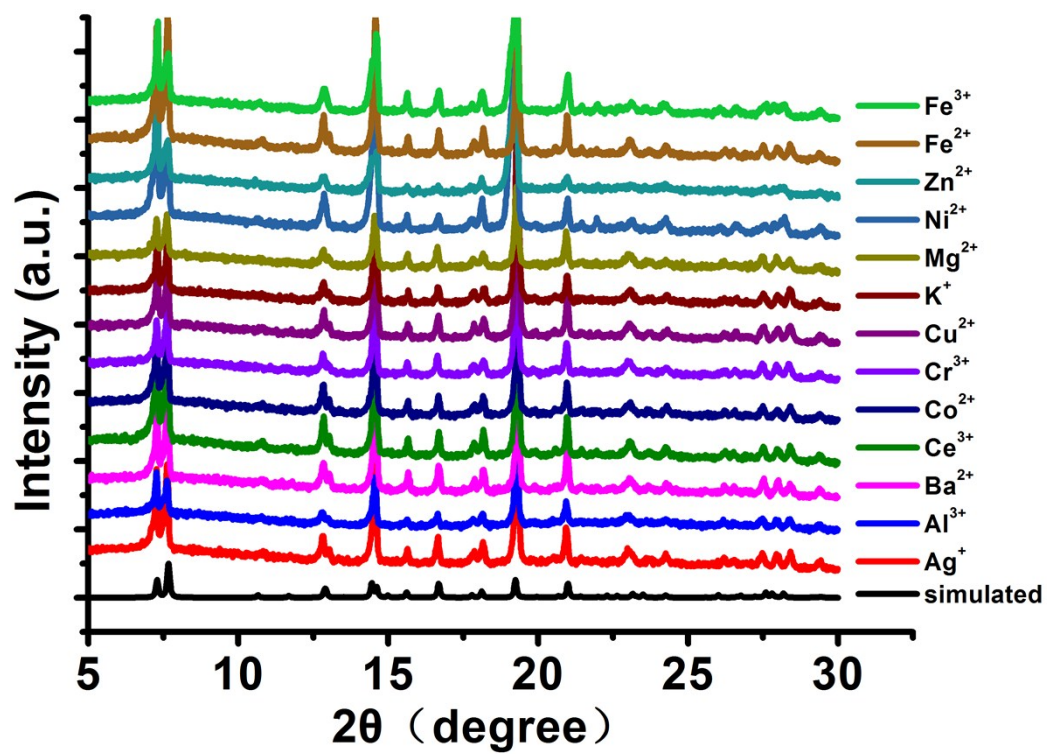

**Fig. S1** Powder XRD patterns of **FJU-13a-Eu** after immersing in aqueous solution containing several of metal ions.

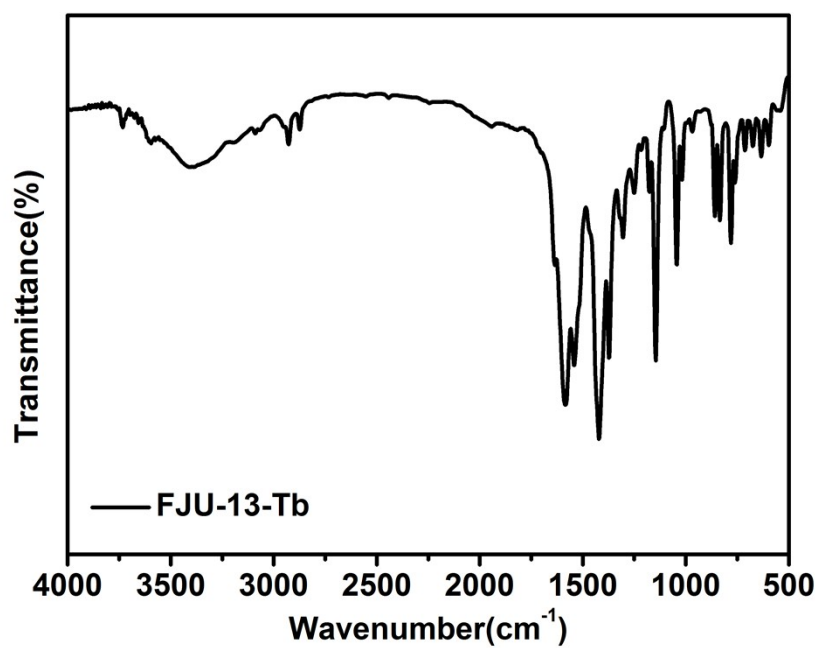

**Fig. S2** IR Spectra of FJU-13-Tb.

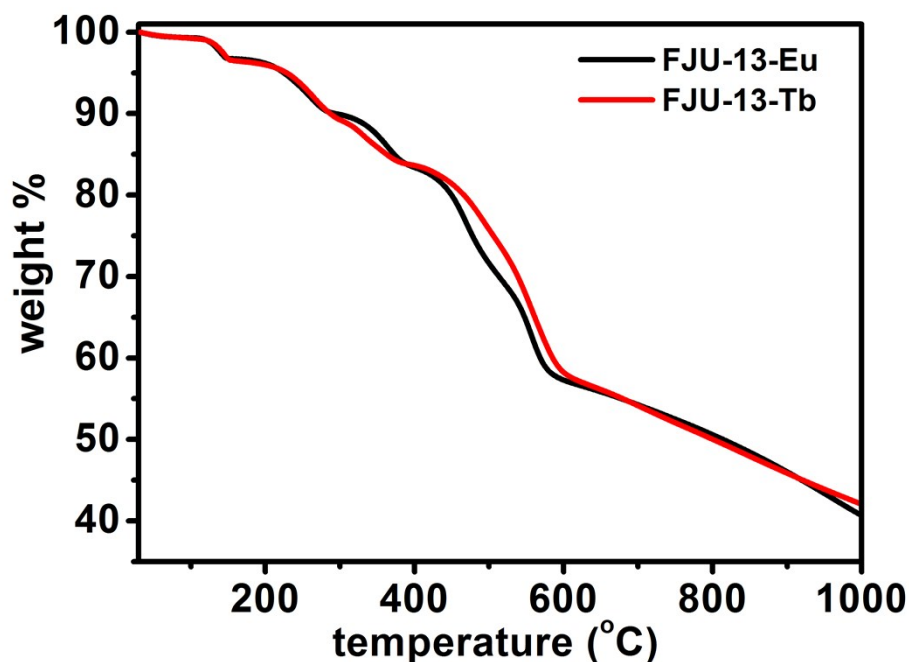

**Fig. S3** TG curves for compounds **FJU-13-Eu** and **FJU-13-Tb**.

In order to identify the thermal stability of the two complexes, the thermogravimetric analyses (TGA) have been carried out from 30 to 1000 °C under a N<sub>2</sub> atmosphere. The TGA curves reveal that they possess similar weight loss processes, hence, only the structure of **FJU-13-Eu** is discussed in detail. The TGA curve of **FJU-13-Eu** shows three weight losses. The first weight loss of 3.2 % from 30 to 153 °C was due to lose one coordinated water molecules (calcd 2.7 %). The second weight loss of 6.5 % from 153 to 284 °C was attributed to the loss of the one coordinated DMA molecules (calcd 6.6 %), and the main frameworks begin to slowly decompose.



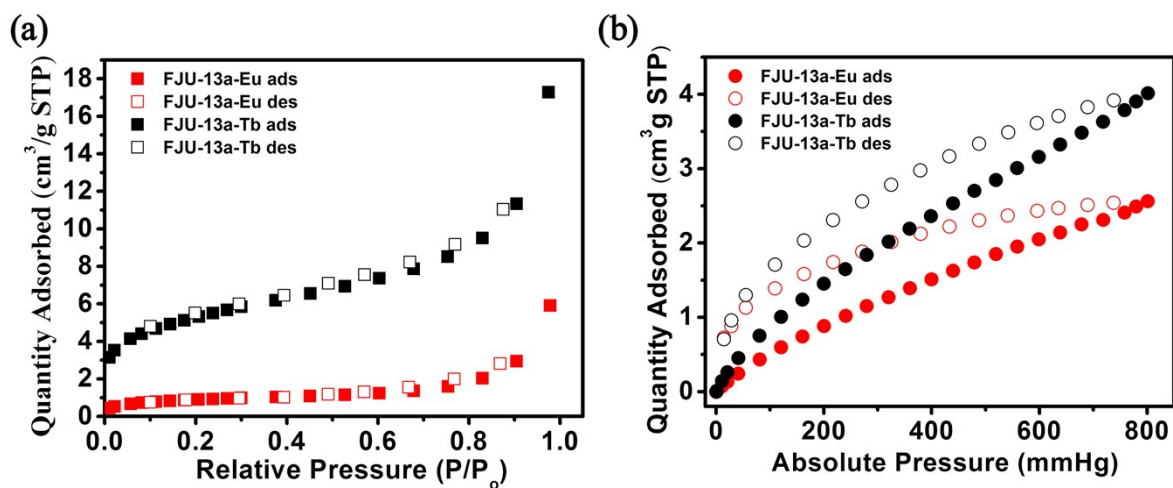

**Fig. S4** 77 K N<sub>2</sub> adsorption (a) and 273 K CO<sub>2</sub> adsorption (b) in **FJU-13a-Eu** and **FJU-13a-Tb**.

The 77 K N<sub>2</sub> adsorption and 273 K CO<sub>2</sub> isotherms of activated **FJU-13-Eu** and **FJU-13-Tb** were measured, but both of them have low adsorption capability.

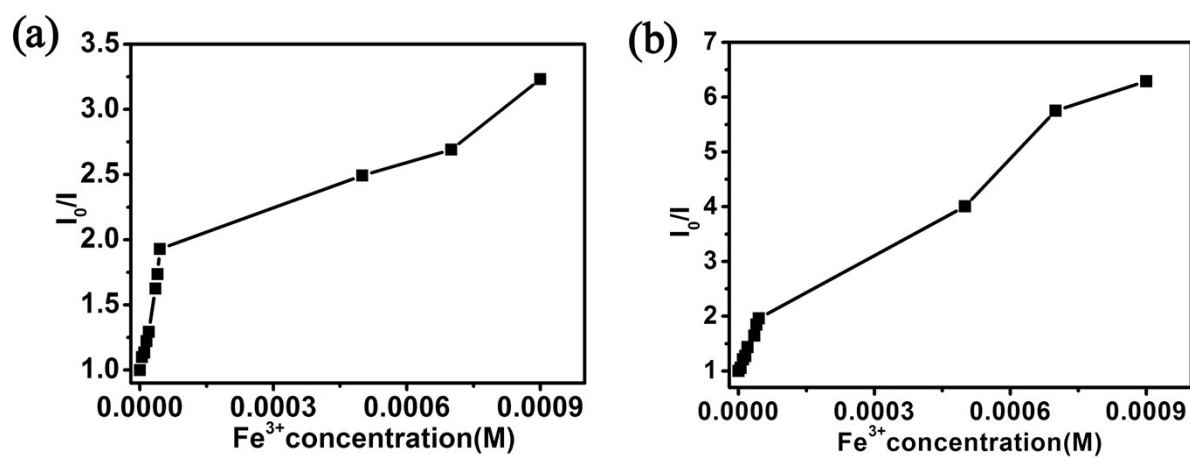

**Fig.S5** Concentration-dependent luminescence quenching of **FJU-13a-Eu** (a) and **FJU-13a-Tb** (b) after adding different concentrations of Fe<sup>3+</sup> ions.

**Liquid phase adsorption studies:** 30 mg activated **FJU-13-Eu** and **FJU-13-Tb** was added to 15 mL 1mM  $\text{Fe}^{3+}$  aqueous solution respectively. Samples for analyses were taken from the reaction suspensions and immediately centrifuged to remove the particles. The adsorption of  $\text{Fe}^{3+}$  was determined using a UV-Vis spectrometer at the maximum absorbance at specified reaction times. The adsorption capacity for  $\text{Fe}^{3+}$  on MOF is calculated using the following equation:  $q_t = [(C_0 - C_t) \times V] / m$ , where  $C_0$  (mol/L) represent the initial concentration of the  $\text{Fe}^{3+}$  and  $C_t$  (mol/L) represent the concentration of  $\text{Fe}^{3+}$  at any specified time,  $V$  represent solution volume (L),  $m$  represent the quality of MOF (g).

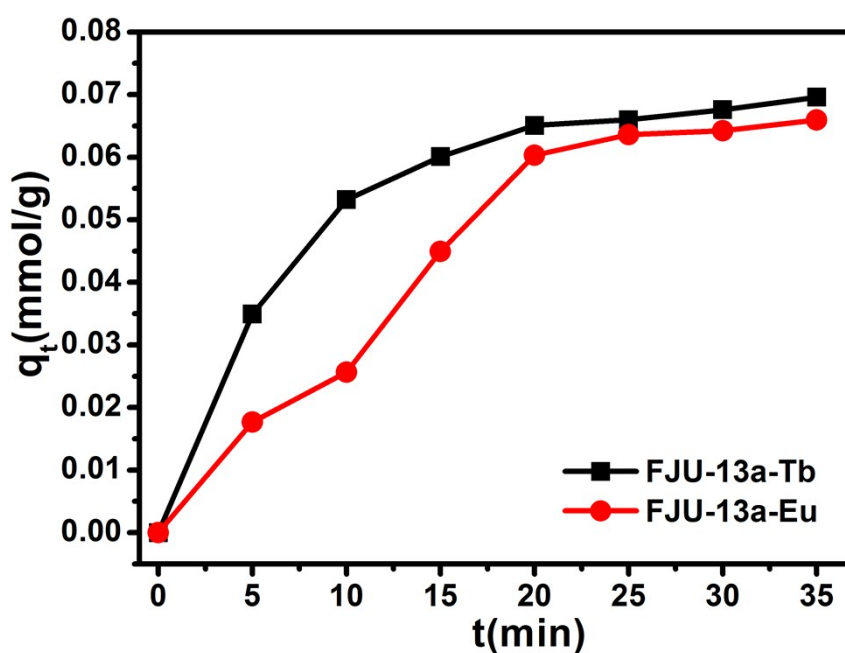

**Fig. S6** Time dependent adsorption capacity of 30 mg of **FJU-13a-Eu** and **FJU-13a-Tb** in 15 mL of  $\text{Fe}^{3+}$  aqueous solution, respectively. The adsorption of iron ions by two MOFs increases with time, and reach adsorption saturation in about 30 min.

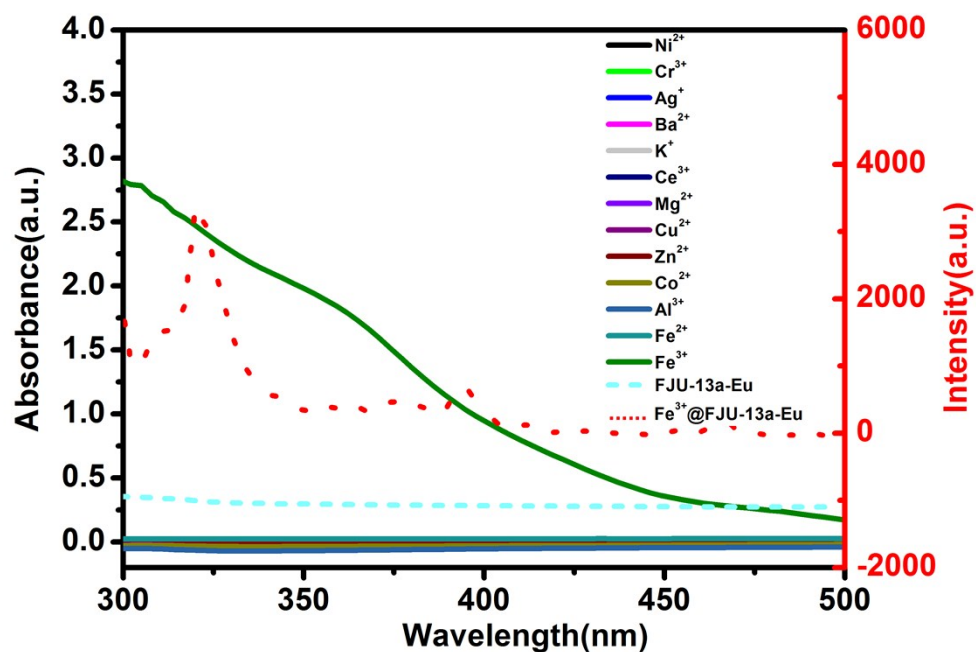

**Fig. S7** Solid line: UV-Vis spectra of aqueous solutions containing 1 mM  $M(\text{NO}_3)_x$  ( $M = \text{Ag}^+, \text{Al}^{3+}, \text{Ba}^{2+}, \text{Ce}^{3+}, \text{Co}^{2+}, \text{Cr}^{3+}, \text{Cu}^{2+}, \text{K}^+, \text{Mg}^{2+}, \text{Ni}^{2+}, \text{Zn}^{2+}, \text{Fe}^{2+}$  and  $\text{Fe}^{3+}$ ); Dashed line: UV-Vis spectra of dispersed 10 mg **FJU-13a-Eu** in 5 mL  $\text{H}_2\text{O}$ ; Dotted line: Excitation spectra of **FJU-13a-Eu**.

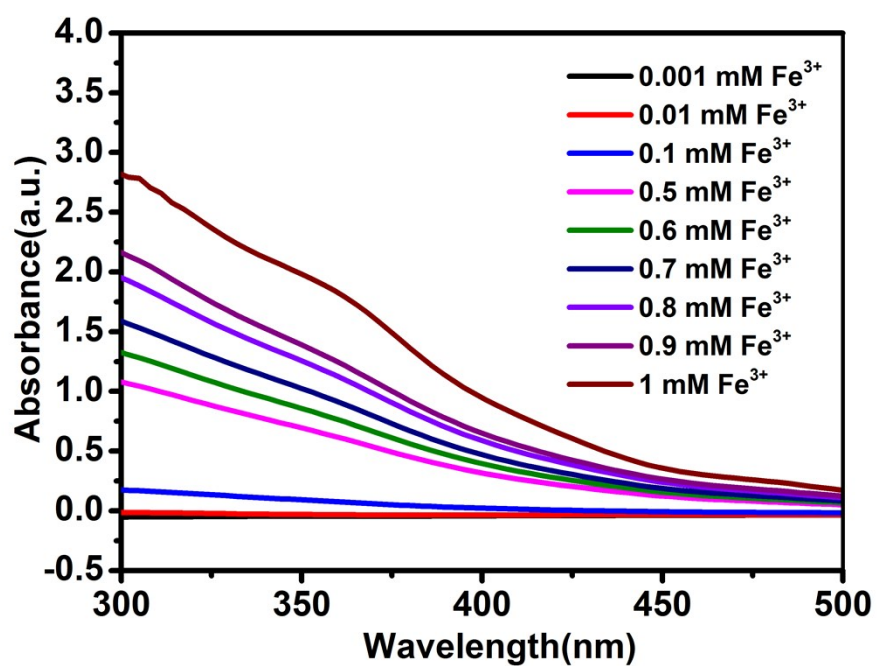

**Fig. S8** UV-Vis spectra of aqueous solutions containing different concentration of  $\text{Fe}^{3+}$ .

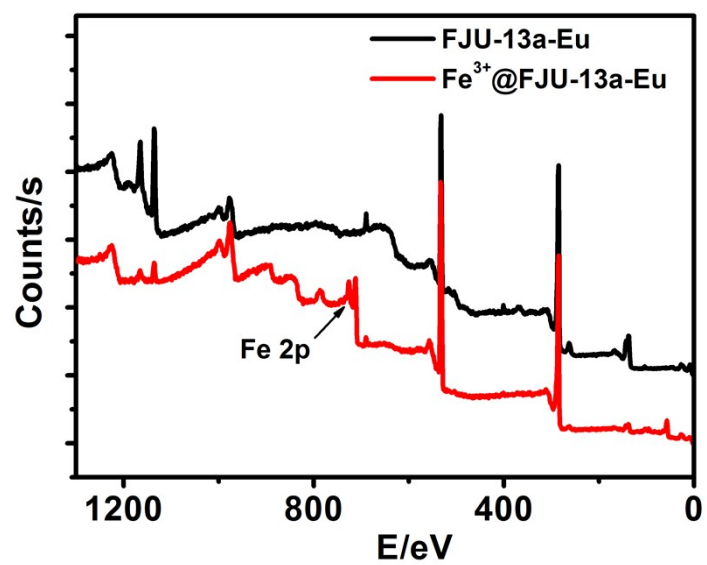

**Fig. S9** X-ray photo-electron spectrum of **FJU-13a-Eu** and **Fe<sup>3+</sup>@FJU-13a-Eu**.

**Table S1** Observed Fe<sup>3+</sup> ion amount in the filtrate solution of MOF **FJU-13a-Eu** before and after the addition of different concentration of Fe(NO<sub>3</sub>)<sub>3</sub> determined by ICP (Inductively Coupled Plasma).

| Concentration of Fe(NO <sub>3</sub> ) <sub>3</sub> (M) added to MOF <b>FJU-13a-Eu</b> | Observed Eu <sup>3+</sup> ion amount(mg) in the filtrate solution | Observed Fe <sup>3+</sup> ion amount(mg) in the filtrate solution | Observed Fe <sup>3+</sup> ion amount(mg) in solid sample <b>Fe<sup>3+</sup>@FJU-13a-Eu</b> after water washing |
|---------------------------------------------------------------------------------------|-------------------------------------------------------------------|-------------------------------------------------------------------|----------------------------------------------------------------------------------------------------------------|
| 0                                                                                     | 0.015                                                             | 0                                                                 | 0                                                                                                              |
| 1×10 <sup>-5</sup>                                                                    | 0.0373                                                            | 0.000288                                                          | 0.0445                                                                                                         |
| 1×10 <sup>-4</sup>                                                                    | 0.013                                                             | 0.000384                                                          | 0.083                                                                                                          |
| 8×10 <sup>-4</sup>                                                                    | 0.0214                                                            | 0.0602                                                            | 0.101                                                                                                          |
| 1×10 <sup>-3</sup>                                                                    | 0.0218                                                            | 0.08416                                                           | 0.298                                                                                                          |

(Each 20 mg MOF **FJU-13-Eu** was activated and immersed in 0 M, 1.00 × 10<sup>-5</sup> M, 1.00 × 10<sup>-4</sup> M, 8.00×10<sup>-4</sup> and 1.00×10<sup>-3</sup> M Fe(NO<sub>3</sub>)<sub>3</sub> aqueous solution, respectively. The filtrate solution was examined by ICP to determine the Fe<sup>3+</sup> amount. ICP were carried out by Thermo-ICAP6300).

**Table S2** Comparison of the detective sensitivity in various Fe<sup>3+</sup> sensors.

| Compound                                                                                                                  | medium      | Stern–Volmer<br>constant $K_{sv}(\text{M}^{-1})$ | detection<br>limit                   | Ref.             |
|---------------------------------------------------------------------------------------------------------------------------|-------------|--------------------------------------------------|--------------------------------------|------------------|
| <b>FJU-13-Eu</b>                                                                                                          | water       | $2.03 \times 10^4$                               | <b>1.41 <math>\mu\text{M}</math></b> | <b>This work</b> |
| <b>FJU-13-Tb</b>                                                                                                          | water       | $2.11 \times 10^4$                               | <b>1.01 <math>\mu\text{M}</math></b> | <b>This work</b> |
| Eu(4'-(4-carboxyphenyl)-2,2':6',2''-terpyridine) <sub>3</sub>                                                             | water       | $4.1 \times 10^3$                                | -                                    | 5                |
| [La(TPT)(DMSO) <sub>2</sub> ]·H <sub>2</sub> O                                                                            | ethanol     | $1.36 \times 10^4$                               | -                                    | 6                |
| Eu-MOF-LIC-1                                                                                                              | DMF         | $2.87 \times 10^4$                               | -                                    | 7                |
| Tb-DSOA                                                                                                                   | water       | $3.543 \times 10^3$                              | -                                    | 8                |
| [H(H <sub>2</sub> O) <sub>8</sub> ][DyZn <sub>4</sub> (imdc) <sub>4</sub> (im) <sub>4</sub> ]                             | DMSO        | $9.29 \times 10^5$                               | -                                    | 9                |
| [Eu(bpda) <sub>1.5</sub> ](H <sub>2</sub> O) <sub>n</sub>                                                                 | water       | $1.25 \times 10^4$                               | 0.9 $\mu\text{M}$                    | 10               |
| [Eu <sub>2</sub> (FDC) <sub>3</sub> DMA(H <sub>2</sub> O) <sub>3</sub> ] · DMA · 4.5H <sub>2</sub> O                      | water       | $1.068 \times 10^4$                              | -                                    | 11               |
| {[Eu(L)(BPDC) <sub>1/2</sub> (NO <sub>3</sub> )]·H <sub>3</sub> O} <sub>n</sub>                                           | DMF         | $5.16 \times 10^4$                               | -                                    | 12               |
| BUT-14                                                                                                                    | water       | $2.17 \times 10^3$                               | 3.8 $\mu\text{M}$                    | 13               |
| BUT-15                                                                                                                    | water       | $1.66 \times 10^4$                               | 0.8 $\mu\text{M}$                    | 14               |
| {[Eu <sub>2</sub> K <sub>2</sub> (dcppa) <sub>2</sub> (H <sub>2</sub> O) <sub>6</sub> ]·5H <sub>2</sub> O} <sub>n</sub>   | ethanol     | $4.30 \times 10^4$                               | 10 <sup>-6</sup> M                   | 14               |
| {[Tb(L)(BPDC) <sub>1/2</sub> (NO <sub>3</sub> )]·H <sub>3</sub> O} <sub>n</sub>                                           | DMF         | $4.30 \times 10^4$                               | -                                    | 13               |
| [Eu <sub>2</sub> (TDC) <sub>3</sub> (CH <sub>3</sub> OH) <sub>2</sub> ·(CH <sub>3</sub> OH)]                              | methanol    | $3.42 \times 10^3$                               | -                                    | 15               |
| [Tb <sub>2</sub> (TDC) <sub>3</sub> (CH <sub>3</sub> OH) <sub>2</sub> ·(CH <sub>3</sub> OH)]                              | methanol    | $3.04 \times 10^4$                               | -                                    | 16               |
| [Cd <sub>2</sub> (H <sub>2</sub> L) <sub>2</sub> (H <sub>2</sub> O) <sub>5</sub> ]<br>·5H <sub>2</sub> O·2DMF             | isopropanol | $2.23 \times 10^4$                               | -                                    | 16               |
| Eu <sup>3+</sup> @MIL-53-COOH (Al)                                                                                        | water       | $5.12 \times 10^3$                               | 0.5 $\mu\text{M}$                    | 17               |
| Eu(atpt) <sub>1.5</sub> (phen)(H <sub>2</sub> O)                                                                          | ethanol     | $7.60 \times 10^3$                               | -                                    | 18               |
| Eu <sub>4</sub> L <sub>3</sub>                                                                                            | DMF         | $2.94 \times 10^3$                               | 10 <sup>-5</sup> M                   | 19               |
| [Gd <sub>6</sub> (L) <sub>3</sub> (HL) <sub>2</sub> (H <sub>2</sub> O) <sub>10</sub> ]·18H <sub>2</sub> O·x(solvent)      | water       | $7.98 \times 10^2$                               | 1.67 ppm                             | 20               |
| {[Cd <sub>3</sub> (HL) <sub>2</sub> (H <sub>2</sub> O) <sub>3</sub> ]·3H <sub>2</sub> O·2CH <sub>3</sub> CN} <sub>n</sub> | water       | $1.04 \times 10^4$                               | $9.06 \times 10^{-5}\text{M}$        | 21               |
| PCN-604                                                                                                                   | water       | $8.53 \times 10^3$                               | 6.2 $\mu\text{M}$                    | 22               |
| Tb-MOF                                                                                                                    | water       | 16590                                            | 10 <sup>-6</sup> M                   | 23               |



**Table S3** Compare the oxygen content of different MOF for detecting iron ions.

| Compound                                                     | O% <sup>a</sup> | $K_{SV} M^{-1}$     | detection limit                | ref              |
|--------------------------------------------------------------|-----------------|---------------------|--------------------------------|------------------|
| Eu-HODA                                                      | 28.48           | $2.09 \times 10^4$  | 6.4 ppb                        | 24               |
| $\{[Eu_2K_2(dcppa)_2(H_2O)_6] \cdot 5H_2O\}_n$               | 20.24           | $4.30 \times 10^4$  | $10^{-6} M$                    | 15               |
| <b>FJU-13-Tb</b>                                             | 19.69           | $2.11 \times 10^4$  | <b>1.01 <math>\mu M</math></b> | <b>This work</b> |
| <b>FJU-13-Eu</b>                                             | 19.56           | $2.03 \times 10^4$  | <b>1.41 <math>\mu M</math></b> | <b>This work</b> |
| $[Pb_3(BPDP)_{1.5}(OOC C_6H_4COOH)_3]$                       | 17.66           | $2.23 \times 10^4$  | -                              | 25               |
| $\{[Cd(5-asba)(bimb)]\}_n$                                   | 16.34           | $1.78 \times 10^4$  | -                              | 26               |
| $[Pb(BPDP)]$                                                 | 15.66           | $2.2 \times 10^4$   | -                              | 26               |
| 534-MOF-Tb                                                   | 13.09           | $5.51 \times 10^3$  | 0.13 mM                        | 27               |
| $\{[Tb_4(OH)_4(DSOA)_2(H_2O)_8] \cdot (H_2O)_8\}_n$          | 11.67           | $3.543 \times 10^3$ | -                              | 28               |
| $\{[Tb(L)(DMA)] \cdot (DMA) \cdot (0.5H_2O)\}$               | 10.89           | $1.912 \times 10^3$ | -                              | 29               |
| $[Cd(\mu_6-cpta)_2(py)_2]_n$                                 | 5.12            | $3.096 \times 10^3$ | 0.21 mM                        | 30               |
| $[Gd_6(L)_3(HL)_2(H_2O)_{10}] \cdot 18H_2O \cdot x(solvent)$ | 4.87            | $7.98 \times 10^2$  | 1.67 ppm                       | 21               |

<sup>a</sup>oxygen content (%) were calculated from the corresponding exposed oxygen sites in the channels or interlayer of the evacuated framework derived from the crystallographic data.

## References

- 1 L. Z. Liu, Y. X. Ye, Z. Z. Yao, L. Q. Zhang, Z. Y. Li, L. H. Wang, X. L. Ma, Q. H. Chen, Z. J. Zhang and S. C. Xiang, *Chinese Journal of Chemistry*, 2016, **34**, 215.
- 2 R. Patra, H. M. Titi and I. Goldberg, *New J. Chem*, 2013, **37**, 1494.
- 3 S. Yoon, E. W. Miller, Q. He, P. H. Do and C. J. Chang, *Angew. Chem., Int. Ed*, 2007, **46**, 6658.
- 4 Y. Q. Xiao, Y. J. Cui, Q. Zheng, S. C. Xiang, G. D. Qian and B. L. Chen, *Chem. Commun*, 2010, **46**, 5503.
- 5 M. Zheng, H. Q. Tan, Z. G. Xie, L. G. Zhang, X. B. Jing and Z. C. Sun, *ACS Appl. Mater. Interfaces*, 2013, **5**, 1078.
- 6 C. Q. Zhang, Y. Yan, Q. H. Pan, L. B. Sun, H. M. He, Y. L. Liu, Z. Q. Liang and J. Y. Li, *Dalton Trans.*, 2015, **44**, 13340.
- 7 (a) J. S. Costa, P. Gamez, C. A. Black, O. Roubeau, S. J. Teat and J. Reedijk, *Eur. J. Inorg. Chem*, 2008, **10**, 1551; (b) J. N. Hao and B. Yan, *J. Mater. Chem. C*, 2014, **2**, 6758.
- 8 X. Y. Dong, R. Wang, J. Z. Wang, S. Q. Zang and T. C. W. Mak, *J. Mater. Chem. A*, 2015, **3**, 641.
- 9 Y. F. Li, D. Wang, Z. Liao, Y. Kang, W. H. Ding, X. J. Zheng and L. P. Jin, *J. Mater. Chem. C*, 2016, **4**, 4211.
- 10 J. Wang, J. R. Wang, Y. Li, M. Jiang, L. W. Zhang and P. Y. Wu, *New J. Chem*, 2016, **40**, 8600.
- 11 L. Li, Q. Chen, Z. G. Niu, X. H. Zhou, T. Yang and W. Huang, *J. Mater. Chem. C*, 2016, **4**, 1900.
- 12 W. Yan, C. L. Zhang, S. G. Chen, L. J. Han and H. G. Zheng, *ACS Appl. Mater. Interfaces*,

- 2017, **9**, 1629.
- 13 B. Wang, Q. Yang, C. Guo, Y. X. Sun, L. H. Xie and J. R. Li, *ACS Appl. Mater. Interfaces*, 2017, **9**, 10286.
- 14 H. J. Zhang, R. Q. Fan, W. Chen, J. Z. Fan, Y. W. Dong, Y. Song, X. Du, P. Wang and Y. L. Yang, *Cryst. Growth Des*, 2016, **16**, 5429.
- 15 K. H. Xu, F. Q. Wang, S. Huang, Z. C. Yu, J. X. Zhang, J. G. Yu, H. Y. Gao, Y. Y. Fu, X. Y. Li and Y. N. Zhao, *RSC Adv*, 2016, **6**, 91741.
- 16 F. Q. Wang, Z. C. Yu, C. M. Wang, K. H. Xu, J. G. Yu, J. X. Zhang, Y. Y. Fu, X. Y. Li, Y. N. Zhao, *Sensors and Actuators B*, 2017, **239**, 688.
- 17 Y. Zhou, H. H. Chen, B. Yan, *J. Mater. Chem. A*, 2014, **2**, 13691.
- 18 Y. Kang, X. J. Zheng, L. P. Jin, *J. Colloid. Interface. Sci*, 2016, **471**, 1.
- 19 W. Liu, X. Huang, C. Xu, C. Y. Chen, L. Z. Yang, W. Dou, W. M. Chen, H. Yang and S. Liu, *Chem. Eur. J*, 2016, **22**, 18769.
- 20 Q. H. Tan, Y. Q. Wang, X. Y. Guo, H. T. Liu, Z. L. Liu, *Rsc Adv*, 2016, **6**, 61725.
- 21 W. Q. Tong, W. N. Liu, J. G. Cheng, P. F. Zhang, G. P. Li, L. Hou and Y. Y. Wang, *Dalton Trans*, 2018, **47**, 9466.
- 22 Y. M. Zhang, X. Y. Yang and H. C. Zhou, *Dalton Trans*, 2018, **47**, 11806.
- 23 Q. S. Zhang, J. Wang, A. M. Kirillov, W. Dou, C. Xu, C. L. Xu, L. Z. Yang, R. Fang and W. S. Liu, *ACS Appl. Mater. Interfaces*, 2018, **10**, 23976.
- 24 J. Wang, M. Jiang, L. Yan, R. Peng, M. Huangfu, X. X. Guo, Y. Li and P. Y. Wu, *Inorg. Chem*, 2016, **55**, 12660.
- 25 B. Xing, H. Y. Li, Y. Y. Zhu, Z. Zhao, Z. G. Sun, D. Yang and J. Li, *RSC Adv*, 2016, **6**, 110255.
- 26 Y. J. Yang, M. J. Wang and K. L. Zhang, *J. Mater. Chem. C*, 2016, **4**, 11404.
- 27 M. Chen, W. M. Xu, J. Y. Tian, H. Cui, J. X. Zhang, C. S. Liu, and M. Du, *J. Mater. Chem. C*, 2017, **5**, 2015.
- 28 X. Y. Dong, R. Wang, J. Z. Wang, S. Q. Zang and T. C. W. Mak, *J. Mater. Chem. A*, 2015, **3**, 641.
- 29 S. Pal and P. K. Bharadwaj, *Cryst. Growth Des*, 2016, **16**, 5852.
- 30 J. Z. Gu, X. X. Liang, Y. H. Cui, J. Wu, Z. F. Shi, A. M. Kirillov, *CrystEngComm*, 2017, **19**, 2570.
